# Supplementary material
Source: HighWire-hosted journal article supplement (https://www.jneurosci.org/content/38/11/2755)
Supplement: inline-supplementary-material-2 [file inline-supplementary-material-2.docx]

| Brain Region | | x | y | z | *t*-value | Cluster size (voxels) |
| --- | --- | --- | --- | --- | --- | --- |
| R | Lingual gyrus | 29.5 | -83.5 | -14.5 | 7.66 | 1296 |
| *R* | *Precuneus* | 5.5 | -62.5 | 27.5 | 6.09 |  |
| *R* | *Posterior cingulate cortex* | 5.5 | -62.5 | 18.5 | 6.07 |  |
| *R* | *Middle occipital gyrus* | 38.5 | -89.5 | 12.5 | 5.93 |  |
| *R* | *Middle occipital gyrus* | 44.5 | -86.5 | 12.5 | 4.47 |  |
| *R* | *Precuneus* | 20.5 | -62.5 | 27.5 | 4.03 |  |
| L | Angular gyrus | -36.5 | -80.5 | 30.5 | 6.28 | 789 |
| *L* | *Inferior parietal lobule* | -33.5 | -35.5 | 57.5 | 5.95 |  |
| *L* | *Cuneus* | -27.5 | -77.5 | 18.5 | 5.39 |  |
| *L* | *Inferior parietal lobule* | -30.5 | -35.5 | 39.5 | 4.76 |  |
| *L* | *Angular gyrus* | -48.5 | -62.5 | 27.5 | 4.62 |  |
| L | Dorsal medial prefrontal cortex | -3.5 | 54.5 | 30.5 | 5.48 | 238 |
| *L* | *Dorsal medial prefrontal cortex* | -3.5 | 60.5 | 33.5 | 5.16 |  |
| *R* | *Dorsal medial prefrontal cortex* | 2.5 | 51.5 | 36.5 | 5.11 |  |
| *R* | *Dorsal medial prefrontal cortex* | 2.5 | 45.5 | 36.5 | 4.88 |  |
| *R* | *Dorsal medial prefrontal cortex* | 11.5 | 63.5 | 27.5 | 4.27 |  |
| *R* | *Dorsal medial prefrontal cortex* | 14.5 | 63.5 | 21.5 | 4.26 |  |
