# Supplementary material
Source: HighWire-hosted journal article supplement (https://www.jneurosci.org/content/38/11/2755)
Supplement: inline-supplementary-material-5 [file inline-supplementary-material-5.docx]

| Brain Region | | x | y | z | *t*-value | Cluster size (voxels) |
| --- | --- | --- | --- | --- | --- | --- |
| L | Lingual gyrus | -9.5 | -68.5 | 3.5 | 10.0 | 2290 |
| *R* | *Lingual gyrus* | 17.5 | -86.5 | -17.5 | 6.89 |  |
| *R* | *Inferior occipital gyrus* | 20.5 | -98.5 | -2.5 | 6.79 |  |
| *R* | *Lingual gyrus* | 17.5 | -92.5 | -11.5 | 6.08 |  |
| *L* | *Cerebellum* | -9.5 | -50.5 | -5.5 | 5.71 |  |
| *R* | *Posterior cingulate cortex* | 8.5 | -50.5 | 0.5 | 5.7 |  |
| R | Fusiform gyrus | 38.5 | -68.5 | -17.5 | 6.03 | 14 |
